# Supplementary material for: Testing the occurrence of convergence in the craniomandibular shape evolution of living carnivorans
Source: PubMed Central journal article supplement (PMC8359831; doi:10.1111/evo.14229), 2021-05-07
Supplement: EVO-75-1738-s001.pdf [file EVO-75-1738-s001.pdf]

**Table S1.** Species and sample sizes.

| Species                         | Mandible |        |         | Cranium |        |         |
|---------------------------------|----------|--------|---------|---------|--------|---------|
|                                 | Male     | Female | Unknown | Male    | Female | Unknown |
| <i>Acinonyx jubatus</i>         | 1        | 1      | 2       | 1       | 1      | 2       |
| <i>Ailuropoda melanoleuca</i>   | 0        | 0      | 1       | 0       | 0      | 1       |
| <i>Ailurus fulgens</i>          | 1        | 2      | 1       | 1       | 2      | 1       |
| <i>Aonyx capensis</i>           | 0        | 0      | 2       | 0       | 0      | 2       |
| <i>Aonyx cinerea</i>            | 1        | 0      | 0       | 1       | 0      | 0       |
| <i>Arctictis binturong</i>      | 0        | 2      | 1       | 0       | 2      | 1       |
| <i>Arctocephalus australis</i>  | 1        | 1      | 3       | 1       | 1      | 2       |
| <i>Arctocephalus forsteri</i>   | 2        | 1      | 0       | 2       | 1      | 0       |
| <i>Arctocephalus gazella</i>    | 4        | 1      | 0       | 3       | 1      | 0       |
| <i>Arctocephalus philippii</i>  | 0        | 0      | 1       | 0       | 0      | 1       |
| <i>Arctocephalus pusillus</i>   | 4        | 5      | 0       | 4       | 5      | 0       |
| <i>Arctocephalus tropicalis</i> | 2        | 0      | 0       | 2       | 0      | 0       |
| <i>Arctogalidia trivirgata</i>  | 1        | 1      | 0       | 1       | 1      | 0       |
| <i>Arctonyx collaris</i>        | 0        | 0      | 1       | 0       | 0      | 1       |
| <i>Atelocynus microtis</i>      | 3        | 2      | 0       | 3       | 1      | 0       |
| <i>Atilax paludinosus</i>       | 0        | 1      | 4       | 0       | 1      | 4       |
| <i>Bassaricyon alleni</i>       | 0        | 0      | 1       | 0       | 0      | 1       |
| <i>Bassariscus astutus</i>      | 0        | 1      | 0       | 0       | 1      | 0       |
| <i>Bassariscus sumichrasti</i>  | 1        | 0      | 0       | 1       | 0      | 0       |
| <i>Bdeogale crassicauda</i>     | 0        | 0      | 2       | 0       | 0      | 2       |
| <i>Bdeogale nigripes</i>        | 0        | 0      | 1       | 0       | 0      | 1       |
| <i>Callorhinus ursinus</i>      | 2        | 3      | 0       | 2       | 3      | 0       |
| <i>Canis adustus</i>            | 2        | 0      | 1       | 2       | 0      | 1       |
| <i>Canis aureus</i>             | 2        | 0      | 1       | 2       | 0      | 1       |
| <i>Canis latrans</i>            | 1        | 1      | 1       | 1       | 1      | 1       |
| <i>Canis lupus</i>              | 6        | 2      | 1       | 6       | 2      | 1       |
| <i>Canis mesomelas</i>          | 0        | 0      | 3       | 0       | 0      | 3       |
| <i>Canis simensis</i>           | 0        | 0      | 3       | 0       | 0      | 6       |
| <i>Caracal aurata</i>           | 0        | 1      | 1       | 0       | 1      | 1       |
| <i>Caracal caracal</i>          | 0        | 0      | 2       | 0       | 0      | 2       |
| <i>Catopuma badia</i>           | 0        | 1      | 0       | 0       | 1      | 0       |
| <i>Catopuma temminckii</i>      | 0        | 0      | 1       | 0       | 0      | 1       |
| <i>Cerdocyon thous</i>          | 0        | 0      | 1       | 0       | 0      | 1       |
| <i>Chrysocyon brachyurus</i>    | 1        | 1      | 2       | 1       | 1      | 2       |
| <i>Civettictis civetta</i>      | 2        | 6      | 2       | 2       | 4      | 2       |
| <i>Conepatus chinga</i>         | 1        | 0      | 0       | 1       | 0      | 0       |
| <i>Conepatus leuconotus</i>     | 0        | 0      | 1       | 0       | 0      | 1       |
| <i>Crocuta crocuta</i>          | 1        | 0      | 6       | 0       | 0      | 6       |
| <i>Cryptoprocta ferox</i>       | 2        | 0      | 0       | 2       | 0      | 0       |
| <i>Cuon alpinus</i>             | 0        | 0      | 2       | 0       | 0      | 2       |
| <i>Cynictis penicillata</i>     | 0        | 0      | 2       | 0       | 0      | 1       |
| <i>Cystophora cristata</i>      | 0        | 1      | 1       | 0       | 1      | 1       |
| <i>Dusicyon australis</i>       | 1        | 0      | 0       | 0       | 0      | 3       |
| <i>Eira barbara</i>             | 1        | 0      | 2       | 1       | 0      | 2       |
| <i>Enhydra lutris</i>           | 0        | 0      | 2       | 0       | 0      | 3       |
| <i>Erignathus barbatus</i>      | 0        | 0      | 1       | 0       | 0      | 1       |
| <i>Eumetopias jubatus</i>       | 2        | 1      | 1       | 1       | 1      | 1       |

| Species                         | Mandible |        |         | Cranium |        |         |
|---------------------------------|----------|--------|---------|---------|--------|---------|
|                                 | Male     | Female | Unknown | Male    | Female | Unknown |
| <i>Felis chaus</i>              | 1        | 0      | 0       | 1       | 0      | 1       |
| <i>Felis margarita</i>          | 1        | 1      | 0       | 1       | 1      | 0       |
| <i>Felis nigripes</i>           | 1        | 1      | 0       | 1       | 1      | 0       |
| <i>Felis silvestris</i>         | 4        | 6      | 2       | 3       | 6      | 1       |
| <i>Galictis cuja</i>            | 0        | 0      | 1       | 0       | 0      | 1       |
| <i>Galictis vittata</i>         | 1        | 0      | 2       | 1       | 0      | 1       |
| <i>Galidia elegans</i>          | 0        | 0      | 2       | 0       | 0      | 2       |
| <i>Galidictis fasciata</i>      | 0        | 0      | 4       | 0       | 0      | 4       |
| <i>Genetta angolensis</i>       | 3        | 0      | 0       | 3       | 0      | 0       |
| <i>Genetta genetta</i>          | 0        | 0      | 1       | 0       | 0      | 1       |
| <i>Genetta maculata</i>         | 3        | 2      | 1       | 3       | 2      | 1       |
| <i>Genetta servalina</i>        | 2        | 0      | 0       | 2       | 0      | 0       |
| <i>Genetta tigrina</i>          | 1        | 0      | 1       | 1       | 0      | 1       |
| <i>Genetta victoriae</i>        | 0        | 0      | 1       | 0       | 0      | 1       |
| <i>Gulo gulo</i>                | 0        | 0      | 4       | 0       | 0      | 4       |
| <i>Halichoerus grypus</i>       | 2        | 3      | 0       | 3       | 3      | 0       |
| <i>Helarctos malayanus</i>      | 1        | 1      | 2       | 0       | 1      | 2       |
| <i>Helogale parvula</i>         | 0        | 0      | 3       | 0       | 0      | 3       |
| <i>Hemigalus derbyanus</i>      | 0        | 1      | 0       | 0       | 1      | 0       |
| <i>Herpailurus yagouaroundi</i> | 0        | 0      | 1       | 0       | 0      | 1       |
| <i>Herpestes auropunctatus</i>  | 0        | 0      | 1       | 0       | 0      | 1       |
| <i>Herpestes edwardsii</i>      | 0        | 0      | 1       | 0       | 0      | 1       |
| <i>Herpestes ichneumon</i>      | 0        | 1      | 2       | 0       | 1      | 2       |
| <i>Herpestes javanicus</i>      | 0        | 0      | 1       | 0       | 0      | 1       |
| <i>Herpestes naso</i>           | 0        | 0      | 1       | 0       | 0      | 1       |
| <i>Herpestes sanguineus</i>     | 0        | 1      | 3       | 0       | 1      | 3       |
| <i>Herpestes smithii</i>        | 0        | 0      | 1       | 0       | 0      | 1       |
| <i>Herpestes vitticollis</i>    | 0        | 0      | 1       | 0       | 0      | 1       |
| <i>Histiophoca fasciata</i>     | 2        | 1      | 0       | 2       | 1      | 0       |
| <i>Hyaena hyaena</i>            | 0        | 2      | 3       | 0       | 2      | 3       |
| <i>Hydrictis maculicollis</i>   | 0        | 0      | 1       | 0       | 0      | 1       |
| <i>Ichneumia albicauda</i>      | 0        | 1      | 2       | 0       | 1      | 1       |
| <i>Ictonyx striatus</i>         | 1        | 1      | 1       | 1       | 1      | 0       |
| <i>Leopardus colocolo</i>       | 0        | 0      | 1       | 0       | 0      | 1       |
| <i>Leopardus geoffroyi</i>      | 0        | 1      | 1       | 0       | 1      | 1       |
| <i>Leopardus guigna</i>         | 0        | 0      | 1       | 0       | 0      | 1       |
| <i>Leopardus pardalis</i>       | 1        | 0      | 1       | 1       | 0      | 2       |
| <i>Leopardus wiedii</i>         | 0        | 1      | 0       | 0       | 0      | 1       |
| <i>Leptailurus serval</i>       | 2        | 1      | 0       | 2       | 1      | 1       |
| <i>Leptonychotes weddellii</i>  | 1        | 2      | 0       | 2       | 2      | 0       |
| <i>Lobodon carcinophaga</i>     | 2        | 2      | 0       | 2       | 2      | 0       |
| <i>Lontra canadensis</i>        | 1        | 0      | 0       | 1       | 0      | 0       |
| <i>Lontra felina</i>            | 0        | 0      | 1       | 0       | 0      | 1       |
| <i>Lontra longicaudis</i>       | 0        | 0      | 1       | 0       | 0      | 1       |
| <i>Lontra provocax</i>          | 0        | 0      | 1       | 0       | 0      | 1       |
| <i>Lutra lutra</i>              | 1        | 0      | 1       | 1       | 0      | 1       |
| <i>Lycalopex culpaeus</i>       | 0        | 0      | 3       | 0       | 0      | 2       |

| Species                         | Mandible |        |         | Cranium |        |         |
|---------------------------------|----------|--------|---------|---------|--------|---------|
|                                 | Male     | Female | Unknown | Male    | Female | Unknown |
| <i>Lycalopex fulvipes</i>       | 0        | 0      | 1       | 0       | 0      | 1       |
| <i>Lycalopex griseus</i>        | 1        | 0      | 7       | 1       | 0      | 5       |
| <i>Lycalopex gymnocercus</i>    | 1        | 1      | 0       | 1       | 1      | 0       |
| <i>Lycalopex vetulus</i>        | 1        | 1      | 0       | 1       | 1      | 0       |
| <i>Lycaon pictus</i>            | 1        | 2      | 4       | 1       | 2      | 4       |
| <i>Lynx canadensis</i>          | 2        | 2      | 1       | 2       | 1      | 1       |
| <i>Lynx lynx</i>                | 0        | 1      | 1       | 0       | 1      | 1       |
| <i>Lynx pardinus</i>            | 0        | 0      | 1       | 0       | 0      | 1       |
| <i>Lynx rufus</i>               | 0        | 0      | 1       | 0       | 0      | 1       |
| <i>Martes americana</i>         | 0        | 0      | 1       | 0       | 0      | 1       |
| <i>Martes flavigula</i>         | 0        | 0      | 1       | 0       | 0      | 1       |
| <i>Martes foina</i>             | 2        | 0      | 0       | 2       | 0      | 0       |
| <i>Martes martes</i>            | 0        | 1      | 2       | 0       | 1      | 2       |
| <i>Martes melampus</i>          | 1        | 0      | 0       | 1       | 0      | 0       |
| <i>Martes pennanti</i>          | 1        | 1      | 0       | 1       | 1      | 0       |
| <i>Meles meles</i>              | 8        | 5      | 0       | 4       | 4      | 0       |
| <i>Mellivora capensis</i>       | 1        | 0      | 2       | 1       | 0      | 1       |
| <i>Melogale moschata</i>        | 1        | 1      | 1       | 1       | 1      | 1       |
| <i>Melursus ursinus</i>         | 2        | 2      | 1       | 2       | 2      | 1       |
| <i>Mephitis macroura</i>        | 1        | 0      | 0       | 0       | 1      | 0       |
| <i>Mephitis mephitis</i>        | 0        | 1      | 0       | 0       | 1      | 0       |
| <i>Mirounga leonina</i>         | 2        | 1      | 0       | 2       | 1      | 0       |
| <i>Monachus monachus</i>        | 2        | 1      | 0       | 2       | 1      | 0       |
| <i>Mungos mungo</i>             | 2        | 2      | 1       | 2       | 1      | 1       |
| <i>Mustela erminea</i>          | 2        | 0      | 3       | 2       | 0      | 2       |
| <i>Mustela frenata</i>          | 0        | 0      | 1       | 0       | 0      | 1       |
| <i>Mustela lutreola</i>         | 0        | 0      | 1       | 0       | 0      | 1       |
| <i>Mustela nivalis</i>          | 2        | 1      | 1       | 1       | 1      | 1       |
| <i>Mustela putorius</i>         | 2        | 1      | 2       | 2       | 1      | 2       |
| <i>Mustela sibirica</i>         | 0        | 0      | 1       | 0       | 0      | 1       |
| <i>Nandinia binotata</i>        | 3        | 3      | 0       | 3       | 3      | 0       |
| <i>Nasua narica</i>             | 0        | 0      | 2       | 0       | 0      | 2       |
| <i>Nasua nasua</i>              | 0        | 0      | 5       | 0       | 0      | 3       |
| <i>Neofelis nebulosa</i>        | 1        | 1      | 0       | 1       | 1      | 0       |
| <i>Neophoca cinerea</i>         | 2        | 1      | 1       | 2       | 1      | 1       |
| <i>Neovison vison</i>           | 5        | 1      | 1       | 5       | 1      | 1       |
| <i>Nyctereutes procyonoides</i> | 1        | 1      | 1       | 1       | 1      | 1       |
| <i>Odobenus rosmarus</i>        | 1        | 0      | 1       | 0       | 0      | 3       |
| <i>Ommatophoca rossii</i>       | 1        | 0      | 1       | 1       | 0      | 1       |
| <i>Otaria byronia</i>           | 3        | 1      | 0       | 3       | 1      | 0       |
| <i>Otocyon megalotis</i>        | 3        | 1      | 2       | 2       | 1      | 2       |
| <i>Pagophilus groenlandicus</i> | 2        | 1      | 2       | 2       | 1      | 1       |
| <i>Paguma larvata</i>           | 0        | 0      | 1       | 0       | 0      | 1       |
| <i>Panthera leo</i>             | 5        | 3      | 2       | 5       | 3      | 1       |
| <i>Panthera onca</i>            | 2        | 1      | 1       | 2       | 1      | 1       |
| <i>Panthera pardus</i>          | 0        | 2      | 6       | 0       | 2      | 5       |
| <i>Panthera tigris</i>          | 1        | 2      | 1       | 1       | 2      | 1       |

| Species                           | Mandible |        |         | Cranium |        |         |
|-----------------------------------|----------|--------|---------|---------|--------|---------|
|                                   | Male     | Female | Unknown | Male    | Female | Unknown |
| <i>Panthera uncia</i>             | 0        | 1      | 1       | 0       | 1      | 1       |
| <i>Paradoxurus hermaphroditus</i> | 0        | 0      | 1       | 0       | 0      | 1       |
| <i>Parahyaena brunnea</i>         | 0        | 0      | 2       | 0       | 0      | 2       |
| <i>Pardofelis marmorata</i>       | 0        | 1      | 0       | 0       | 1      | 0       |
| <i>Phoca largha</i>               | 1        | 1      | 0       | 1       | 1      | 0       |
| <i>Phoca vitulina</i>             | 0        | 0      | 3       | 0       | 0      | 3       |
| <i>Phocarcotos hookeri</i>        | 3        | 0      | 0       | 3       | 0      | 0       |
| <i>Poecilogale albinucha</i>      | 0        | 0      | 2       | 0       | 0      | 2       |
| <i>Potos flavus</i>               | 1        | 1      | 0       | 1       | 1      | 0       |
| <i>Prionailurus bengalensis</i>   | 0        | 0      | 3       | 0       | 0      | 3       |
| <i>Prionailurus planiceps</i>     | 0        | 1      | 0       | 0       | 1      | 0       |
| <i>Prionailurus rubiginosus</i>   | 0        | 0      | 1       | 0       | 0      | 1       |
| <i>Prionailurus viverrinus</i>    | 0        | 0      | 2       | 0       | 0      | 2       |
| <i>Prionodon linsang</i>          | 0        | 0      | 1       | 0       | 0      | 1       |
| <i>Procyon cancrivorus</i>        | 0        | 1      | 1       | 0       | 1      | 2       |
| <i>Procyon lotor</i>              | 1        | 1      | 1       | 1       | 1      | 1       |
| <i>Proteles cristata</i>          | 1        | 0      | 2       | 1       | 0      | 2       |
| <i>Pteronura brasiliensis</i>     | 2        | 0      | 0       | 2       | 0      | 0       |
| <i>Puma concolor</i>              | 0        | 1      | 1       | 0       | 1      | 1       |
| <i>Pusa caspica</i>               | 0        | 2      | 0       | 0       | 2      | 0       |
| <i>Pusa hispida</i>               | 2        | 1      | 1       | 2       | 1      | 1       |
| <i>Pusa sibirica</i>              | 1        | 1      | 0       | 1       | 1      | 0       |
| <i>Rhynchogale melleri</i>        | 0        | 0      | 1       | 0       | 0      | 1       |
| <i>Salanoia concolor</i>          | 1        | 0      | 2       | 1       | 0      | 1       |
| <i>Speothos venaticus</i>         | 1        | 1      | 0       | 1       | 1      | 0       |
| <i>Spilogale putorius</i>         | 0        | 0      | 1       | 0       | 0      | 1       |
| <i>Suricata suricatta</i>         | 0        | 0      | 1       | 0       | 0      | 1       |
| <i>Taxidea taxus</i>              | 0        | 0      | 1       | 0       | 0      | 2       |
| <i>Tremarctos ornatus</i>         | 3        | 0      | 0       | 2       | 0      | 0       |
| <i>Urocyon cinereoargenteus</i>   | 2        | 2      | 2       | 2       | 1      | 2       |
| <i>Urocyon littoralis</i>         | 0        | 0      | 1       | 0       | 0      | 1       |
| <i>Ursus americanus</i>           | 2        | 2      | 2       | 2       | 2      | 2       |
| <i>Ursus arctos</i>               | 3        | 4      | 4       | 3       | 4      | 4       |
| <i>Ursus maritimus</i>            | 0        | 0      | 5       | 0       | 0      | 4       |
| <i>Ursus thibetanus</i>           | 1        | 1      | 1       | 1       | 1      | 1       |
| <i>Viverra zibetha</i>            | 2        | 0      | 0       | 2       | 0      | 0       |
| <i>Viverra zibetha</i>            | 0        | 1      | 0       | 0       | 0      | 1       |
| <i>Viverricula indica</i>         | 0        | 0      | 5       | 0       | 0      | 5       |
| <i>Vulpes cana</i>                | 1        | 0      | 0       | 1       | 0      | 0       |
| <i>Vulpes chama</i>               | 1        | 2      | 1       | 1       | 2      | 1       |
| <i>Vulpes corsac</i>              | 0        | 0      | 2       | 0       | 0      | 1       |
| <i>Vulpes ferrilata</i>           | 2        | 0      | 1       | 2       | 0      | 1       |
| <i>Vulpes lagopus</i>             | 2        | 2      | 6       | 2       | 2      | 6       |
| <i>Vulpes rueppellii</i>          | 0        | 1      | 0       | 0       | 1      | 0       |
| <i>Vulpes vulpes</i>              | 6        | 5      | 0       | 6       | 5      | 0       |
| <i>Vulpes zerda</i>               | 1        | 0      | 1       | 1       | 0      | 0       |
| <i>Zalophus californianus</i>     | 2        | 1      | 0       | 2       | 1      | 0       |
